# Supplementary material for: Isolation and growth characterization of novel full length and deletion mutant human MERS-CoV strains from clinical specimens collected during 2015
Source: PubMed Central journal article supplement (PMC7079693; doi:10.1099/jgv.0.001334), 2019-10-08
Supplement: jgv-100-1523-s001.pdf [file jgv-100-1523-s001.pdf]

|                         |       |                                                             |       |
|-------------------------|-------|-------------------------------------------------------------|-------|
| Hu/Aseer_KSA_RS924_2015 | 25532 | ATGAGAGTTCAAAGACCACCCACTCTCTTGTTAGTGTCTCACTCTCTCTTTTGGTCACT | 25591 |
| Hu/England-Qatar_2012   | 25532 | AUGAGAGUUCAAAGACCACCCACUCUCUUGUUAGUGUUCACUCUCUCUUUUGGUCACU  | 25591 |
| Hu/Aseer_KSA_RS924_2015 | 25592 | GCATTTTCAAACCTCTCTATGTACCTGAGCATTGTCAGAATTATTCTGGTTGCATGCTT | 25651 |
| Hu/England-Qatar_2012   | 25592 | GCAUUUCAAACCCUCUCUAUGUACCUGAGCAUUGUCAGAAUUAUUCUGGUUGCAUGCUU | 25651 |
| Hu/Aseer_KSA_RS924_2015 | 25652 | AGGGCTTGTATTAAACTGCCCAAGCTGATACAGCTGGTCTTTATACAAATTTTCGAATT | 25711 |
| Hu/England-Qatar_2012   | 25652 | AGGGCUUGUAUUAAAACUGCCCAAGCUGAUACAGCUGGUCUUUAUACAAUUUUCGAAUU | 25711 |
| Hu/Aseer_KSA_RS924_2015 | 25712 | GACGTCCCATCTGCAGAATCAACTGGTACTCAATCAGTTTCTGTGATCGTGAGTCAACT | 25771 |
| Hu/England-Qatar_2012   | 25712 | GACGUCCCAUCUGCAGAAUCAACUGGUACUCAUCAGUUUCUGUCGAUCGUGAGUCAACU | 25771 |
| Hu/Aseer_KSA_RS924_2015 | 25772 | TCAACTCATGATGGTCCT-----C                                    | 25790 |
| Hu/England-Qatar_2012   | 25772 | UCAACUCAUGAUGGUCCUACCGAACAUUUUCUAGUGUGAAUCUUUUUGACGUUGGUUAC | 25831 |
| Hu/Aseer_KSA_RS924_2015 | 25791 | TCAGTTAATTAA                                                | 25802 |
| Hu/England-Qatar_2012   | 25832 | UCAGUAAUUA                                                  | 25843 |

Supplementary figure 1. Nucleotide alignment of ORF3 Hu/Aseer\_KSA\_RS924\_2015 and Hu/England-Qatar\_2012
